# Supplementary material for: Sustainable castor oil-derived cross-linked poly(ester-urethane) elastomeric films for stretchable transparent conductive electrodes and heaters
Source: Royal Society of Chemistry journal article supplement (doi:10.1039/d4ta05338a), 2024-01-01
Supplement: d4ta05338a1.pdf [file d4ta05338a1.pdf]

## Supporting Information

### **Sustainable Castor Oil-derived Cross-linked Poly(ester-urethane) Elastomeric Films for Stretchable Transparent Conductive Electrodes and Heaters**

Timo Laukkanen<sup>a†</sup>, Pulikanti Guruprasad Reddy<sup>a\*†</sup>, Amit Barua<sup>a</sup>, Manish Kumar<sup>a</sup>, Kristofer Kolpakov<sup>a</sup>, Teija Tirri<sup>b</sup>, and Vipul Sharma<sup>a\*</sup>

<sup>a</sup>Department of Mechanical and Materials Engineering, University of Turku, Turku–20500, Finland.

<sup>b</sup>Faculty of Science and Engineering, Åbo Akademi University, Turku–20500, Finland.

\*Corresponding author e-mail address: [guru.pulikanti@utu.fi](mailto:guru.pulikanti@utu.fi), [vipul.sharma@utu.fi](mailto:vipul.sharma@utu.fi)

† Both authors contributed equally

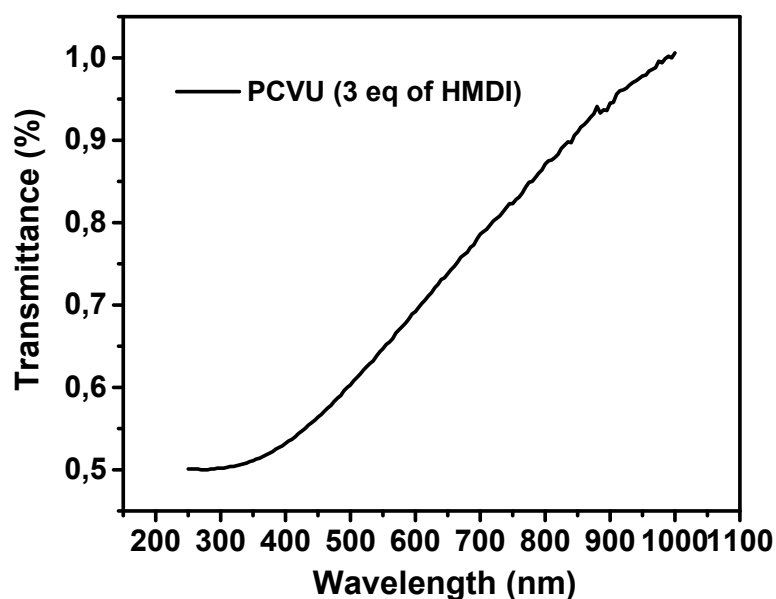

**Fig. S1** Transmittance profile of PCVU elastomer that prepared using prepolymer and HMDI in 1:3 molar ratios.

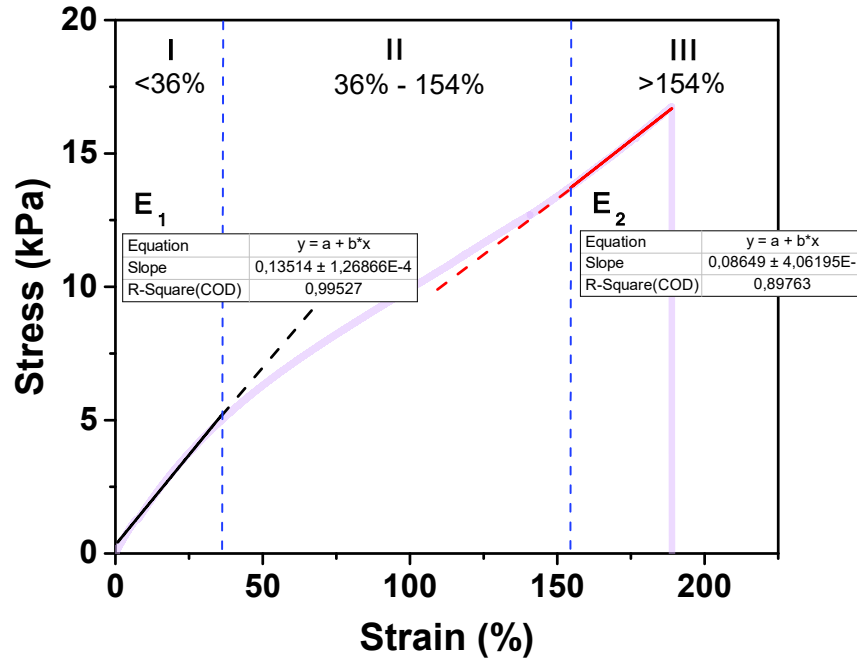

**Fig. S2** Elastic moduli calculation using two linear fits at E1 and E2 regions in the stress-strain curve of PCVU elastomer.

| <b>Table S1.</b> Weight change of PCVU substrate exposed in different organic solvents over time. |                                                                  |         |             |                 |                   |
|---------------------------------------------------------------------------------------------------|------------------------------------------------------------------|---------|-------------|-----------------|-------------------|
| Test time (h)                                                                                     | Weight of PCVU after exposing in different organic solvents (mg) |         |             |                 |                   |
|                                                                                                   | Methanol                                                         | Ethanol | Isopropanol | Dichloromethane | Dimethylformamide |
| 0h (no solvent exposure)                                                                          | 135,3                                                            | 93,0    | 72,4        | 47,4            | 107,1             |
| 1h                                                                                                | 135,4                                                            | 96,9    | 74,3        | 47,7            | 108,9             |
| 2h                                                                                                | 134,3                                                            | 96,9    | 72,2        | 47,0            | 108,2             |
| 5h                                                                                                | 133,6                                                            | 93,9    | 71,3        | 47,1            | 107,2             |
| 19h                                                                                               | 132,6                                                            | 92,2    | 71,2        | 47,1            | 106,2             |
| 24h                                                                                               | 133,0                                                            | 94,01   | 71,1        | 46,5            | 107,1             |

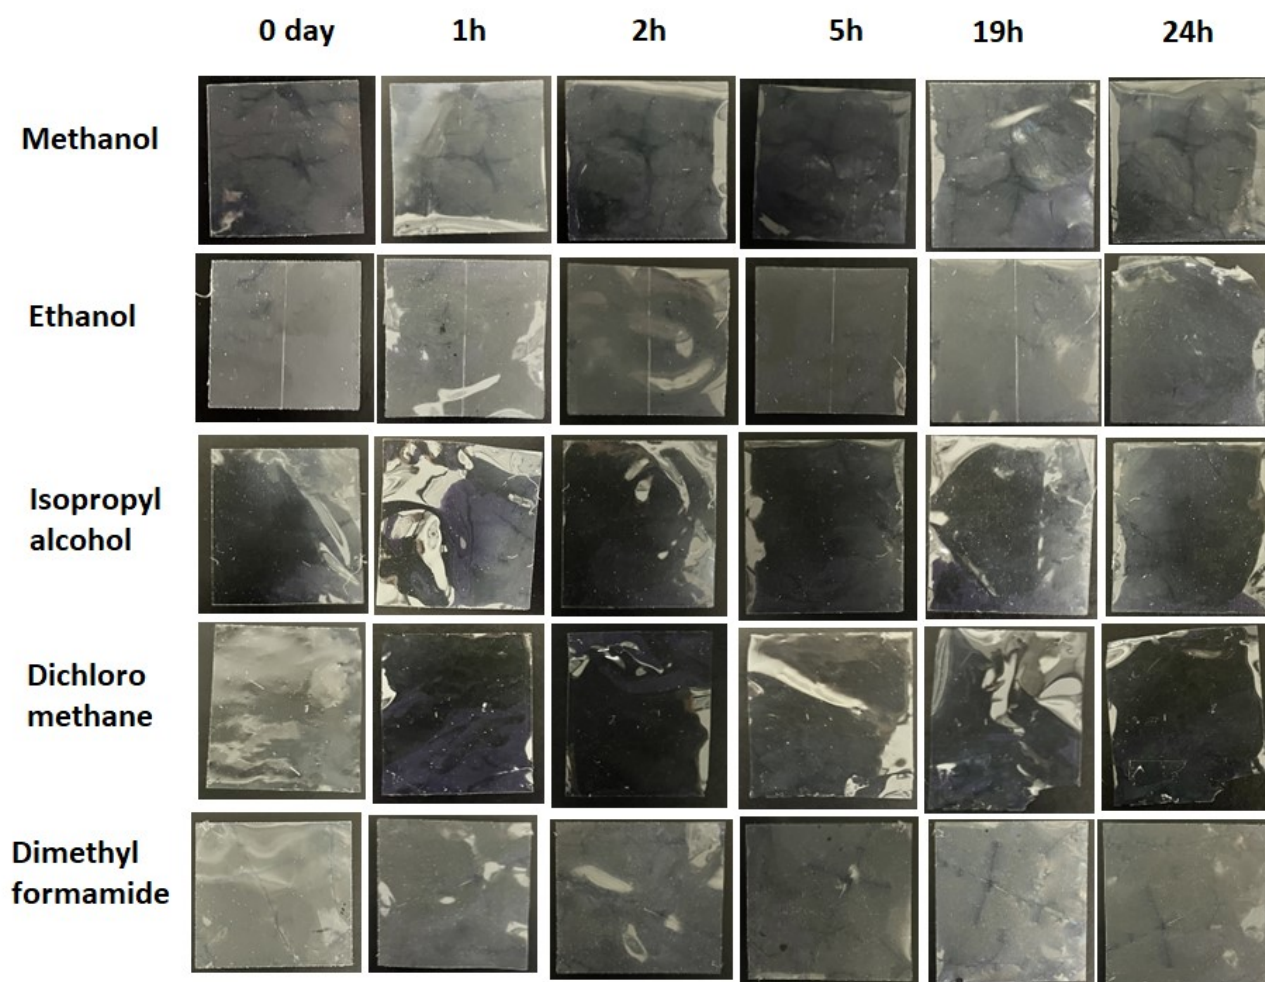

**Fig. S3** Camera images PCVU substrates underwent exposure in different organic solvents (methanol, ethanol, isopropanol, dichloromethane and dimethylformamide) over time (1h, 2h, 5h, 19h, and 24h).

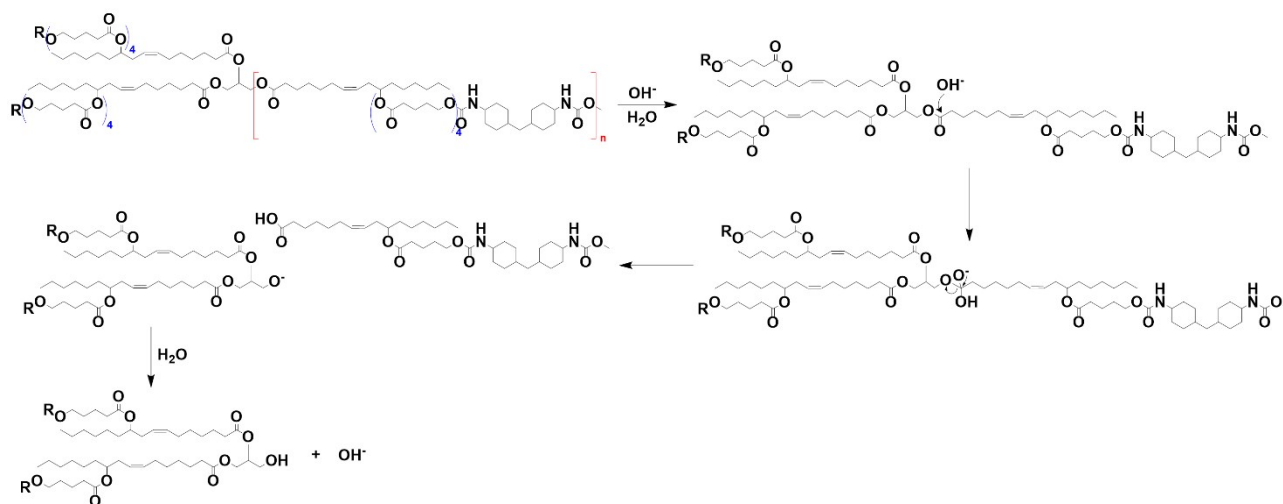

**Fig. S4** Possible mechanism for the hydrolytic cleavage of ester bonds in PCVU catalyzed by  $\text{OH}^-$  in the pH = 14 aqueous solutions.

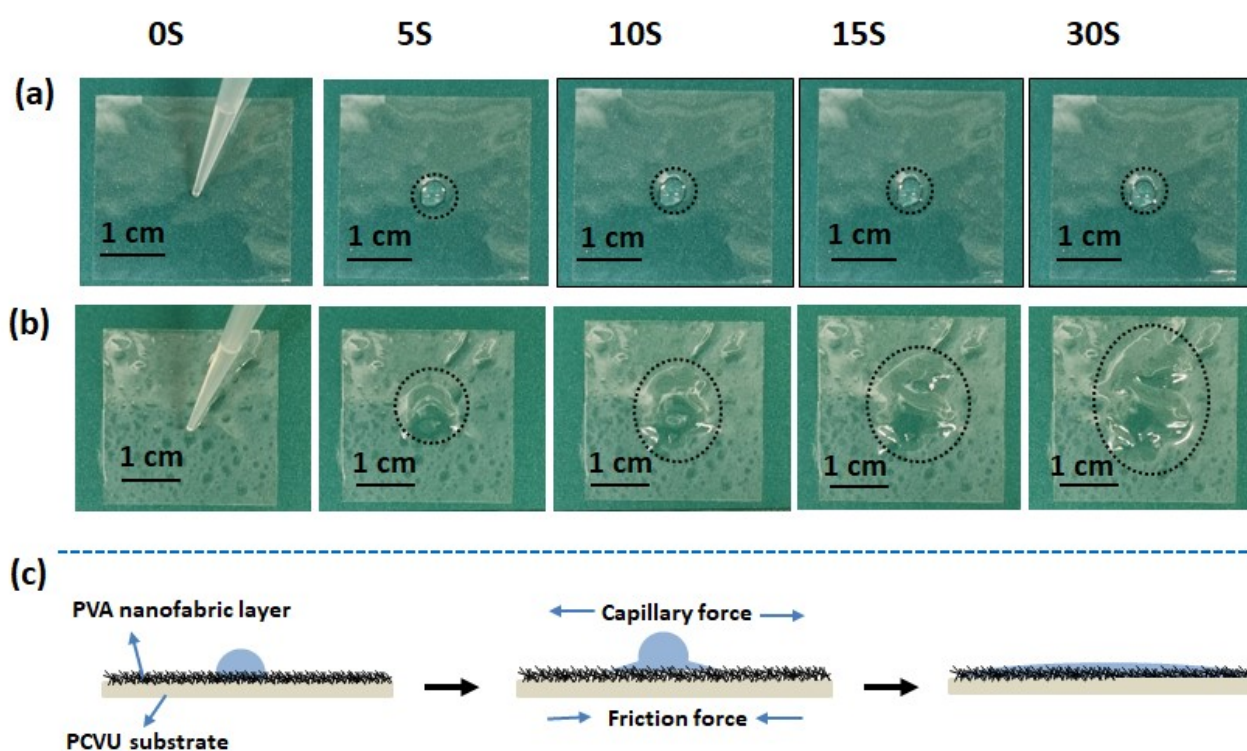

**Fig. S5** Camera images of AgNWs in ethanol-water droplets on PVA-coated and uncoated PCVU substrates: (a) No spreading of droplets on the uncoated PCVU substrate at time intervals of 0s, 5s, 10s, 15s, and 30s. (b) Spreading of droplets on the PVA-coated PCVU substrate at the same intervals. (c) Mechanism of spreading for ethanol-water droplets on the PVA-coated PCVU substrate.

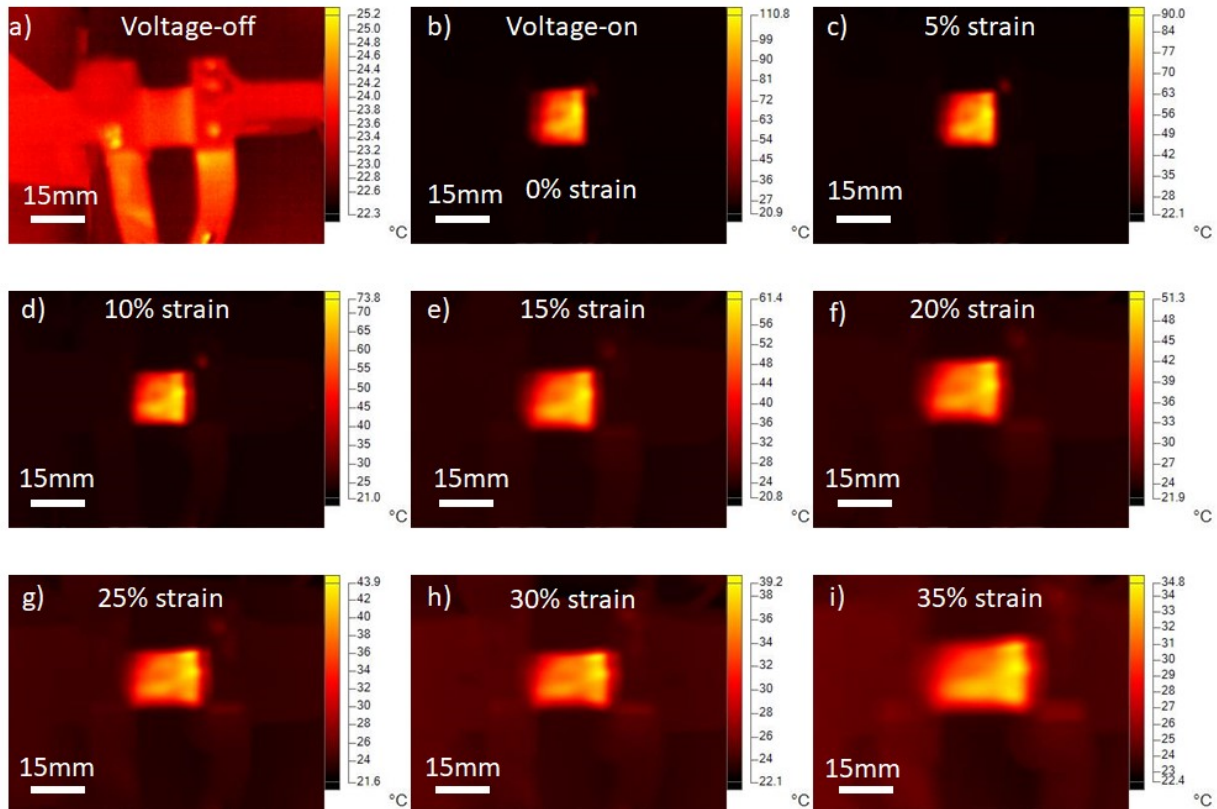

**Fig. S6** IR thermal images showing reversible heating characteristics with the applied strain at 4V: (a) Heater at voltage-off state; heating performance of the heater at voltage-on (4V) state at (b) 0% strain, (c) 5% strain, (d) 10% strain, (e) 15% strain, (f) 20% strain, (g) 25% strain, (h) 30% strain, (i) 35% strain.

**Table S2.** Comparison of high-performance flexible heaters reported in the literature with PCVU heater reporting in this work.

| Type of heater                              | Response time (s) | cooling time (s) | maximum temperature (°C) | Voltage (V) | Degradability | Transparency (%) | Reference           |
|---------------------------------------------|-------------------|------------------|--------------------------|-------------|---------------|------------------|---------------------|
| <b>PCVU-based heater</b>                    | <b>15 s</b>       | <b>15s</b>       | <b>160 °C</b>            | <b>5.5V</b> | <b>yes</b>    | <b>~75%</b>      | <b>Present work</b> |
| AgNWs/Leaf heater                           | 5-10s             | 15s              | 125 °C                   | 6V          | yes           | 80-86%           | 1                   |
| ANF/AgNW paper-based heater                 | 10-30 s           | -                | ~200 °C                  | 5V          | -             | 40%              | 2                   |
| all-polymeric transparent thin film heaters | 250-385 s         | 400s             | 45-114°C                 | 10V         | no            | 87-90%           | 3                   |
| AgBMs/ePI conducting film heater            | 8s                | 15s              | ~204 °C                  | 8V          | no            | 70%              | 4                   |
| AgNW@rGO based flexible transparent heater  | 50s               | 80s              | 366oC                    | 7V          | no            | 90%              | 5                   |
| Ag NMs/ePLLA heater                         | 6 s               | -                | 111.8 °C                 | 3V          | yes           | 50%              | 6                   |
| cupronickel-based micromesh film heater     | 60s               | 100s             | 225 °C                   | 9V          | no            | 85.6%            | 7                   |
| PPFC/Ag bilayer thin film heater            | 300s              | 150s             | 136.7 °C                 | 6.8V        | no            | 80%              | 8                   |
| Hanji cellulose paper-based heater          | 150s              | -                | 175 °C                   | 10V         | yes           | -                | 9                   |

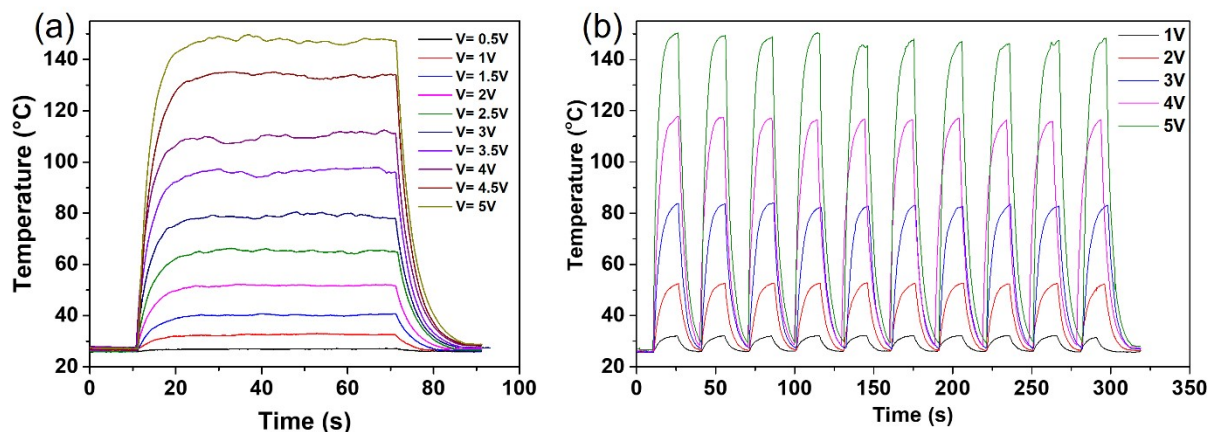

**Fig. S7** Two months old heater data. (a) Time-dependent temperature profile of the heater at different applied voltages for 60 sec (0.5-5V). (b) Temperature response to voltage on-off studies testing under various voltages (1V to 5V).

#### References:

- 1 V. Sharma, A. Koivikko, K. Yiannacou, K. Lahtonen and V. Sariola, *npj Flexible Electronics* 2020 4:1, 2020, **4**, 1–8.
- 2 Z. Ma, S. Kang, J. Ma, L. Shao, A. Wei, C. Liang, J. Gu, B. Yang, D. Dong, L. Wei and Z. Ji, *ACS Nano*, 2019, **13**, 7578–7590.
- 3 M. N. Gueye, A. Carella, R. Demadrille and J. P. Simonato, *ACS Appl. Mater. Interfaces*, 2017, **9**, 27250–27256.
- 4 B. Sun, R. Xu, X. Han, J. Xu, W. Hong, Y. Xu, Z. Fu, H. Zhu, X. Sun, J. Wang, P. Cui, J. Chang, J. Xiong and K. Qian, *npj Flexible Electronics* 2022 6:1, 2022, **6**, 1–9.
- 5 Y. Yang, S. Chen, W. Li, P. Li, J. Ma, B. Li, X. Zhao, Z. Ju, H. Chang, L. Xiao, H. Xu and Y. Liu, *ACS Nano*, 2020, **14**, 8754–8765.
- 6 W. Hong, B. Sun, Z. Li, Z. Fu, J. Zhang, M. Jiang, Y. Zhang, Y. Li, Y. Zhang and K. Qian, *ACS Appl Electron. Mater.*, 2022, **4**, 5446–5455.
- 7 H. J. Kim, Y. Kim, J. H. Jeong, J. H. Choi, J. Lee and D. G. Choi, *J. Mater. Chem. A*, 2015, **3**, 16621–16626.
- 8 H. Park, H. Kim, S. H. Kim, E. Cho, H. K. Kim and S. J. Lee, *Thin Solid Films*, 2022, **753**, 139294.
- 9 W. Lim, A. Khadka, B. Y. Kim, C. Park, A. Aldalbahi, G. Periyasami, B. Joshi and S. S. Yoon, *J Mater. Sci. Technol.*, 2023, **164**, 27–36.
